# Supplementary material for: Association of Serum Lipoprotein (a) With the Requirement for a Peripheral Artery Operation and the Incidence of Major Adverse Cardiovascular Events in People With Peripheral Artery Disease
Source: PubMed Central journal article supplement — J Am Heart Assoc. 2020 Mar 14;9(6):e015355. doi: 10.1161/JAHA.119.015355 (PMC7335512; doi:10.1161/jaha.119.015355), 2020-03-14
Supplement: JAH3-9-e015355-s001.pdf [file JAH3-9-e015355-s001.pdf]

# **SUPPLEMENTAL MATERIAL**

**Table S1. Fully adjusted Cox regression model for association of lipoprotein (a)  $\geq$  30 mg/ml with requirement for any PAD operation.**

| <b>Risk factor</b>                    | <b>Beta coefficient</b> | <b>Standard error</b> | <b>P value</b> | <b>Hazard ratio</b> | <b>Lower 95% CI</b> | <b>Upper 95% CI</b> |
|---------------------------------------|-------------------------|-----------------------|----------------|---------------------|---------------------|---------------------|
| Lipoprotein (a) $\geq$ 30             | 0.179                   | 0.083                 | 0.032          | 1.20                | 1.02                | 1.41                |
| Age (per year)                        | -0.003                  | 0.005                 | 0.553          | 1.00                | 0.99                | 1.01                |
| Female sex                            | -0.152                  | 0.104                 | 0.142          | 0.86                | 0.70                | 1.05                |
| Diabetes                              | -0.101                  | 0.096                 | 0.294          | 0.90                | 0.75                | 1.09                |
| Hypertension                          | 0.043                   | 0.101                 | 0.668          | 1.04                | 0.86                | 1.27                |
| Coronary heart disease                | -0.005                  | 0.085                 | 0.950          | 1.00                | 0.84                | 1.18                |
| Smoking history*                      |                         |                       | 0.123          |                     |                     |                     |
| Former smoking                        | 0.130                   | 0.141                 | 0.355          | 1.14                | 0.87                | 1.50                |
| Current smoking                       | 0.243                   | 0.128                 | 0.059          | 1.28                | 0.99                | 1.64                |
| Presenting problem†                   |                         |                       | <0.001         |                     |                     |                     |
| AAA                                   | 0.140                   | 0.097                 | 0.150          | 1.15                | 0.95                | 1.39                |
| CLI                                   | 0.631                   | 0.140                 | <0.001         | 1.88                | 1.43                | 2.48                |
| LDL-C (per mmol/l)                    | -0.006                  | 0.044                 | 0.893          | 0.99                | 0.91                | 1.08                |
| eGFR (per ml/min/1.73m <sup>2</sup> ) | 0.005                   | 0.002                 | 0.037          | 1.01                | 1.00                | 1.01                |
| Statin prescription                   | -0.031                  | 0.096                 | 0.745          | 0.97                | 0.80                | 1.17                |

AAA= abdominal aortic aneurysm; CLI= critical limb ischemia; LDL-C= low density lipoprotein-cholesterol; eGFR= estimated glomerular filtration rate; CI= confidence interval.
